# Supplementary material
Source: ML conference proceedings conference paper supplement (https://openaccess.thecvf.com/content/cvpr_2017/html/Shen_Weakly_Supervised_Dense_2017_CVPR_paper.html)
Supplement: Supplementary file 2 [file Shen_Weakly_Supervised_Dense_2017_CVPR_supplemental.pdf]

# Weakly Supervised Dense Video Captioning

## Supplementary Materials

### 1. Region-sequence Generation Algorithm

Algorithm 1 describes the region-sequence generation method, which is based on the CELF (Cost-Effective Lazy Forward selection) algorithm [1]. In this algorithm,  $m$  is the number of regions in a sequence,  $UC$  and  $CB$  are the abbreviation for uniform cost and cost benefit respectively.

### 2. Response Maps

Figure 1 shows some examples of response maps (heatmaps) generated by the Lexical-FCN model. We first associate the response maps to the words in the sentences based on the computed probabilities, and then visualize the best match.

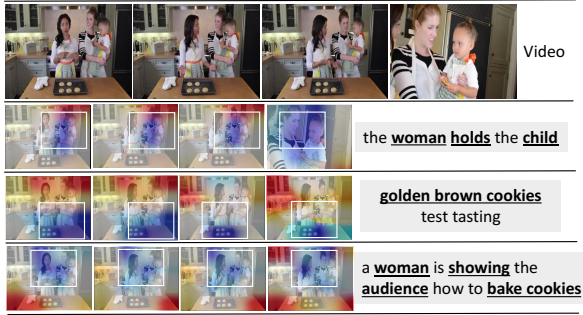

Figure 1. Visualization of learned response maps from the last CNN layer (left), and the corresponding natural sentences (right). The blue areas in the response maps are of high attention, and the region-sequences are highlighted in white bounding-boxes.

### 3. Sentence Re-ranking Module

Figure 2 shows the diagram of our sentence re-ranking module, which re-rank multiple predicted sentences from dense video captioning. This module is similar to [2], which learns the cosine similarity between video features and sentence features with a neural network evaluator.

### 4. More Result Examples

More result examples of our DenseVideoCap system are provided in Figures 3, 4, 5, 6.

**Algorithm 1** Region-sequence generation by submodular maximization with the CELF algorithm [1].

---

```

1: function LAZYFORWARD( $S_v, x_v, R, m, type$ )
2:    $\mathcal{A} \leftarrow \emptyset;$  ▷ Start with the empty sequence
3:   for each  $r \in S_v$  do  $\mathcal{L}(w; r) \leftarrow \infty$  ▷ Init marginal gains
4:   end for
5:   while  $|\mathcal{A}| < m$  do
6:     for each  $r \in S_v \setminus \mathcal{A}$  do  $cur_s \leftarrow \text{false};$ 
7:     end for
8:     while true do ▷ Begin loop
9:       if  $type = UC$  then ▷ Uniform cost
10:         $r^* \leftarrow \arg \max_{r \in S_v \setminus \mathcal{A}} \mathcal{L}(w; r);$  ▷ Max gain
11:       end if
12:       if  $type = CB$  then ▷ Cost benefit
13:         $r^* \leftarrow \arg \max_{r \in S_v \setminus \mathcal{A}} \frac{\mathcal{L}(w; r)}{R(r)};$  ▷ Max gain / cost
14:       end if
15:       if  $cur_{r^*}$  then  $\mathcal{A} \leftarrow \mathcal{A} \cup \{r^*\};$  break;
16:       else ▷ Update marginal gain
17:          $\mathcal{L}(w; r) \leftarrow R(\mathcal{A} \cup \{r\}) - R(\mathcal{A});$ 
18:          $cur_{r^*} \leftarrow \text{true};$ 
19:       end if
20:     end while
21:   end while
22:   return  $\mathcal{A};$  ▷ Return region-sequence
23: end function
24:
25: function MAIN( $S_v, x_v, R, m$ )
26:    $\mathcal{A}_{UC} \leftarrow \text{LAZYFORWARD}(S_v, x_v, R, m, UC)$ 
27:    $\mathcal{A}_{CB} \leftarrow \text{LAZYFORWARD}(S_v, x_v, R, m, CB)$ 
28:   return  $\arg \max\{R(\mathcal{A}_{UC}), R(\mathcal{A}_{CB})\}$ 
29: end function

```

---

### References

- [1] J. Leskovec, A. Krause, and et al. Cost-effective outbreak detection in networks. In *ACM SIGKDD*, 2007. 1
- [2] R. Shetty and J. Laaksonen. Frame- and segment-level features and candidate pool evaluation for video caption generation. *arXiv:1608.04959*, 2016. 1

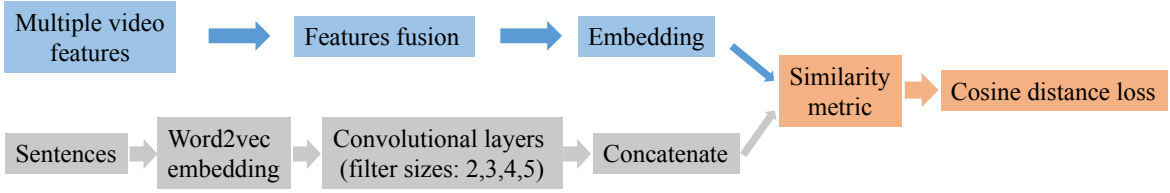

Figure 2. Illustration of the sentence re-ranker module.

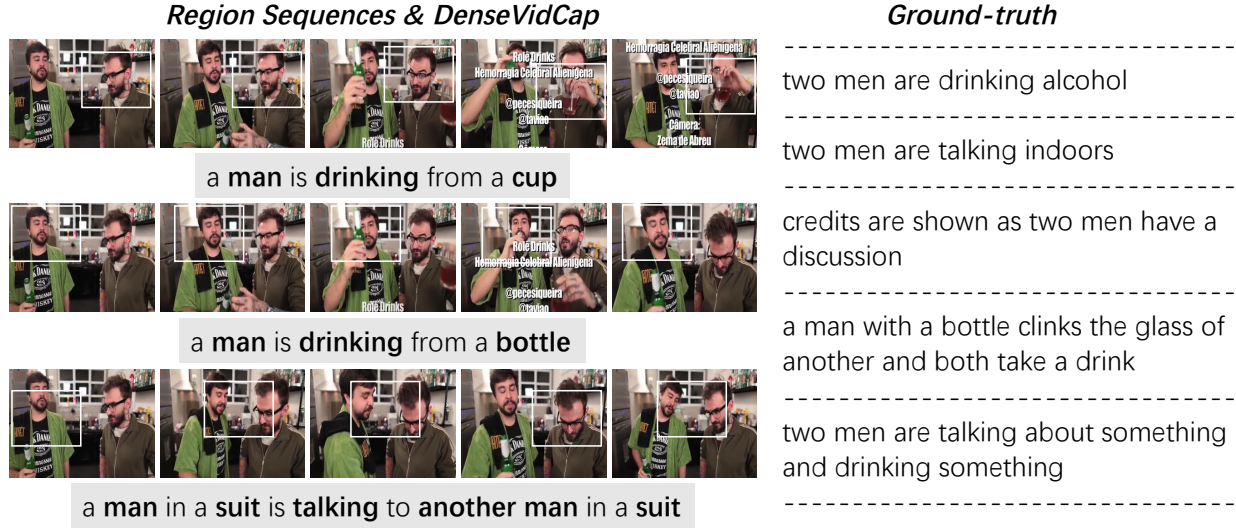

Figure 3. Left: Examples of dense sentences produced by our *DenseVidCap* method and corresponding *region sequences*; Right: Ground-truth (video6974).

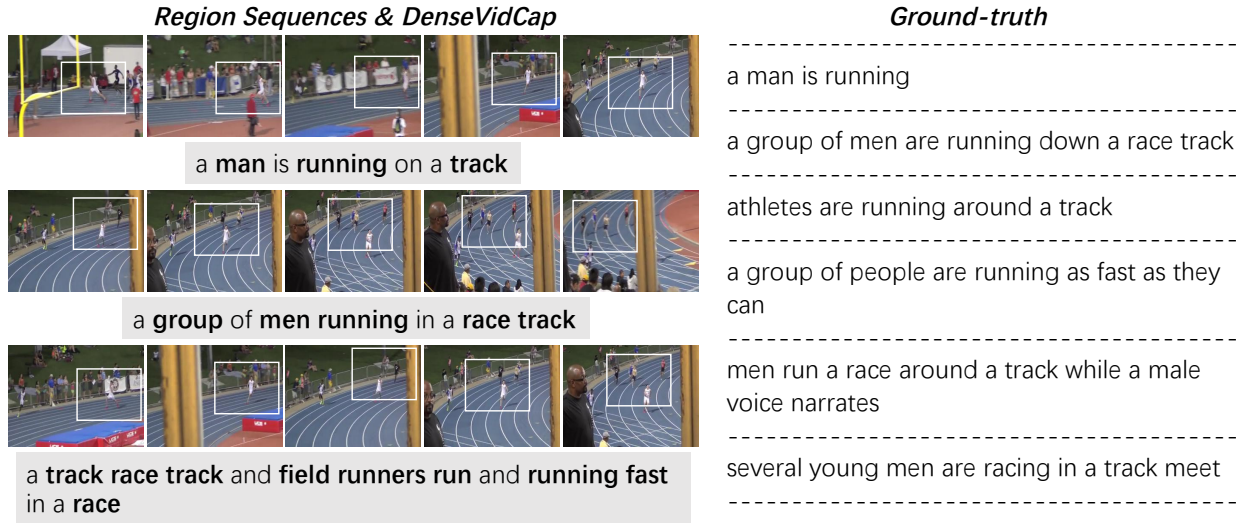

Figure 4. Left: Examples of dense sentences produced by our *DenseVidCap* method and corresponding *region sequences*; Right: Ground-truth (video6967).

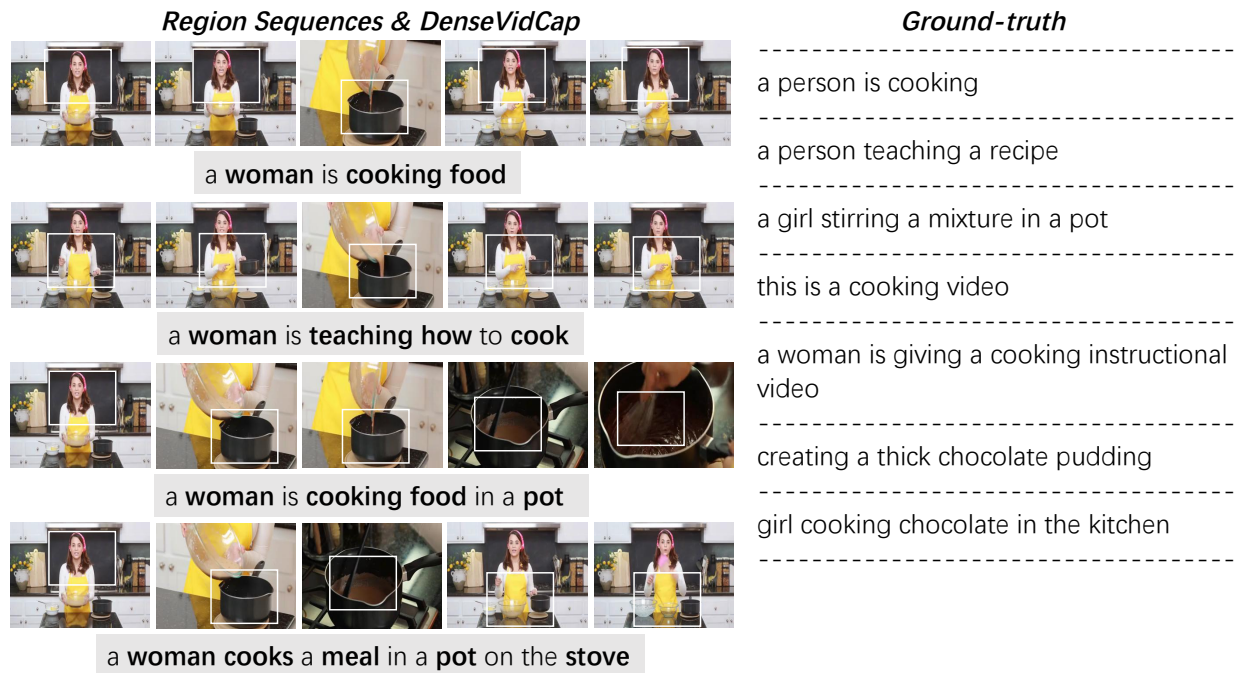

Figure 5. Left: Examples of dense sentences produced by our *DenseVidCap* method and corresponding *region sequences*; Right: Ground-truth (video6911).

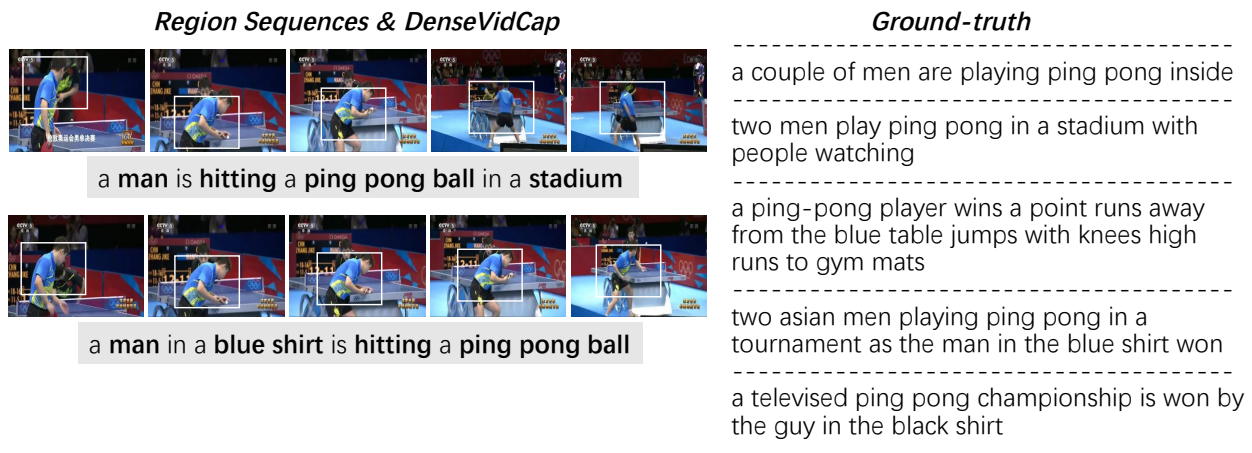

Figure 6. Left: Examples of dense sentences produced by our *DenseVidCap* method and corresponding *region sequences*; Right: Ground-truth (video6973).
